# Supplementary material for: How Ionic Liquid Gels Work on the Removal of Bisphenol A from Wastewater
Source: PubMed Central journal article supplement — ACS Mater Au. 2022 Nov 29;3(2):112–22. doi: 10.1021/acsmaterialsau.2c00066 (PMC9999478; doi:10.1021/acsmaterialsau.2c00066), 2022-11-29
Supplement: mg2c00066_si_001.pdf [file mg2c00066_si_001.pdf]

## **Supporting Information**

# **How Ionic Liquid Gels Work on the Removal of Bisphenol A from Wastewater**

*Salvatore Marullo and Francesca D'Anna\**

*Università degli Studi di Palermo, Dipartimento di Scienze Biologiche, Chimiche e Farmaceutiche,*

*Viale delle Scienze, Ed. 17, 90128 Palermo, Italia*

\*Corresponding author: Prof. F. D'Anna. E-mail: francesca.danna@unipa.it

## Table of contents

|                                                                                                                                      |            |
|--------------------------------------------------------------------------------------------------------------------------------------|------------|
| <b>Figure S1.</b> Strain and Frequency sweeps of 3 wt% DBS-based ionogels.                                                           | <b>S3</b>  |
| <b>Figure S2.</b> Pictures of the cut halves of gels of DBS (3 wt%) taken after 5 h and 24 h.                                        | <b>S4</b>  |
| <b>Table S1.</b> Removal efficiency as a function of time, for 3 wt% gels of DBS in aliphatic ionic liquids.                         | <b>S5</b>  |
| <b>Table S2.</b> Removal efficiency as a function of time, for 3 wt% gels of DBS in aromatic ionic liquids.                          | <b>S6</b>  |
| <b>Table S3.</b> Removal efficiency in the recycle of 3 wt% gels of DBS in [bmpyrr][NTf <sub>2</sub> ] and [bmim][PF <sub>6</sub> ]. | <b>S7</b>  |
| <b>Table S4.</b> Removal efficiency in the recycle of 3 wt% gel of DBS in [bmim][NTf <sub>2</sub> ].                                 | <b>S8</b>  |
| <b>Table S5.</b> Removal efficiency in the recycle of 3 wt% gel of DBS in [bmipip][NTf <sub>2</sub> ].                               | <b>S9</b>  |
| <b>Table S6.</b> Adsorption capacities and equilibrium concentrations for 3wt% gels of DBS in aromatic ILs.                          | <b>S10</b> |
| <b>Table S7.</b> Adsorption capacities and equilibrium concentrations for 3wt% gels of DBS in aliphatic ILs.                         | <b>S11</b> |

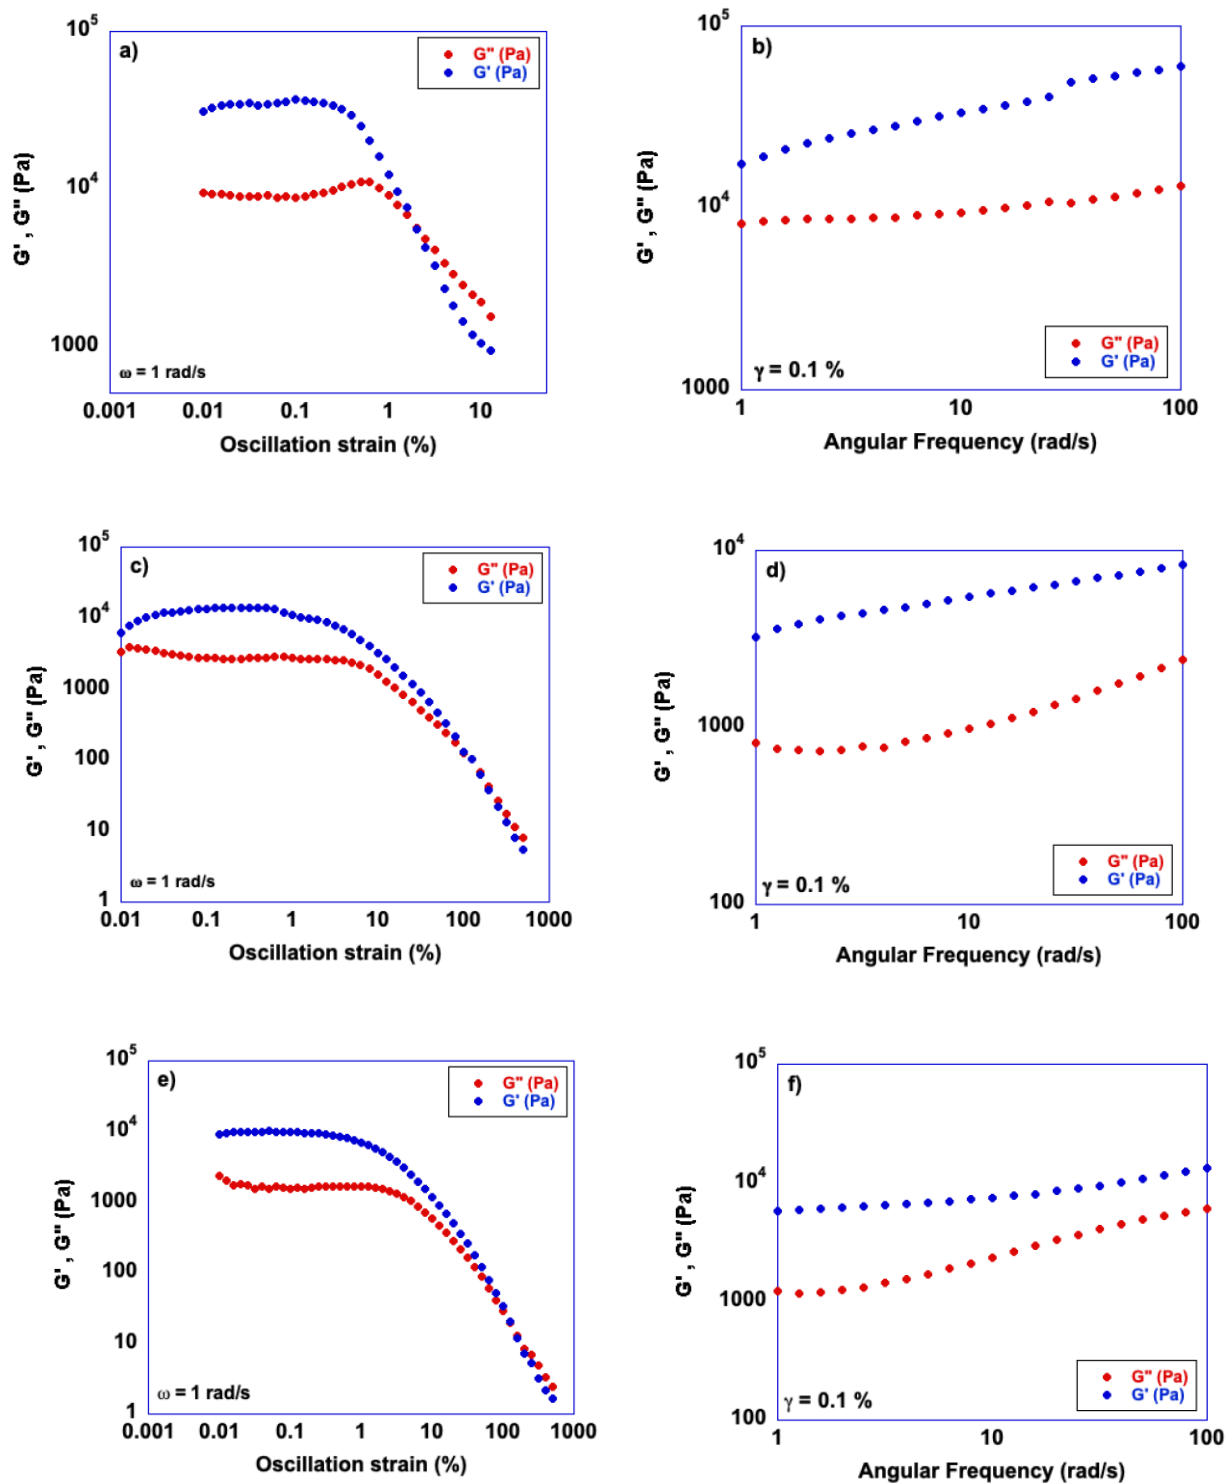

**Figure S1.** Strain- and frequency sweeps of 3 wt% gels in a), b), [bmpip][NTf<sub>2</sub>]; c), d), [bmim][PF<sub>6</sub>]; e), f), [bmim][NTf<sub>2</sub>];

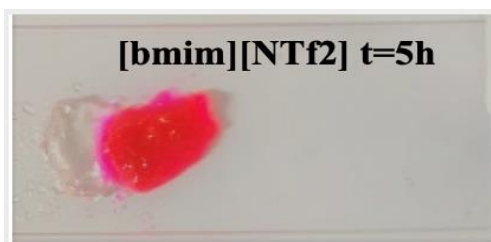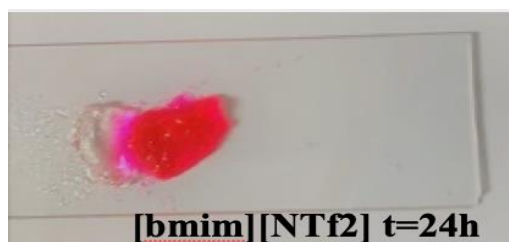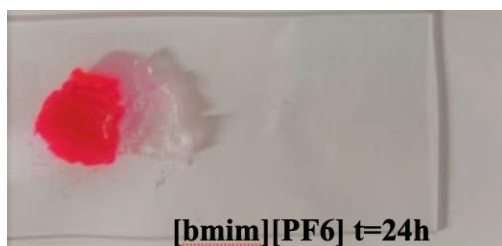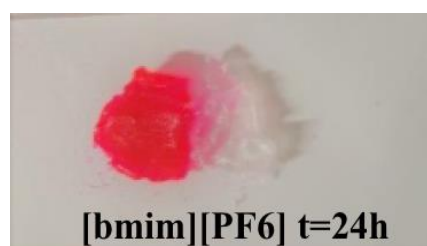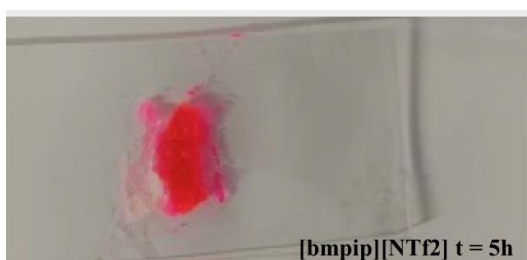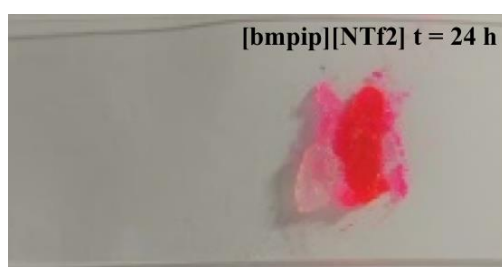

**Figure S2.** Pictures of the cut halves of gels of DBS (3 wt%) taken after 5 h and 24 h.

**Table S1.** Removal efficiency as a function of time, for 3 wt% gels of DBS in aliphatic ionic liquids.

| <b>[bmpyrr][NTf<sub>2</sub>]</b> |                           |
|----------------------------------|---------------------------|
| <b>Time (min)</b>                | <b>RE (%)<sup>a</sup></b> |
| 5                                | 43                        |
| 20                               | 43                        |
| 30                               | 62                        |
| 50                               | 88                        |
| 60                               | 90                        |
| 90                               | 88                        |
| 180                              | 87                        |
| 240                              | 90                        |
| <b>[bmpip][NTf<sub>2</sub>]</b>  |                           |
| <b>Time (min)</b>                | <b>RE (%)</b>             |
| 15                               | 22                        |
| 30                               | 44                        |
| 90                               | 50                        |
| 120                              | 66                        |
| 180                              | 73                        |
| 240                              | 95                        |
| 300                              | 93                        |
| 360                              | 96                        |

[a] Average of duplicate experiments. RE% are reproducible within 4%

**Table S2.** Removal efficiency as a function of time, for 3 wt% gels of DBS in aromatic ionic liquids.

| <b>[bmim][NTf<sub>2</sub>]</b> |                           |
|--------------------------------|---------------------------|
| <b>Time (min)</b>              | <b>RE (%)<sup>a</sup></b> |
| 30                             | 27                        |
| 60                             | 46                        |
| 90                             | 53                        |
| 150                            | 55                        |
| 180                            | 57                        |
| 240                            | 56                        |
| 300                            | 70                        |
| 360                            | 75                        |
| 900                            | > 96                      |
| 1140                           | > 96                      |
| <b>[bmim][PF<sub>6</sub>]</b>  |                           |
| <b>Time (min)</b>              | <b>RE (%)</b>             |
| 30                             | 34                        |
| 60                             | 48                        |
| 120                            | 51                        |
| 180                            | 68                        |
| 240                            | 70                        |
| 300                            | 78                        |
| 420                            | 84                        |
| 1170                           | >96                       |

[a] Average of duplicate experiments. RE% are reproducible within 4%

**Table S3.** Removal efficiency relevant to the recycle of 3 wt% gels of DBS in [bmpyrr][NTf<sub>2</sub>] and [bmim][PF<sub>6</sub>].

| <b>[bmpyrr][NTf<sub>2</sub>]</b> |                           |
|----------------------------------|---------------------------|
| <b>Cycle</b>                     | <b>RE (%)<sup>a</sup></b> |
| 1                                | 96                        |
| 2                                | 93                        |
| 3                                | >96                       |
| 4                                | 91                        |
| 5                                | 88                        |
| 6                                | 86                        |
| 7                                | 89                        |
| 8                                | 72                        |
| 9                                | 61                        |
| <b>[bmim][PF<sub>6</sub>]</b>    |                           |
| <b>Cycle</b>                     | <b>RE (%)</b>             |
| 1                                | >96                       |
| 2                                | >96                       |
| 3                                | >96                       |
| 4                                | >96                       |
| 5                                | >96                       |
| 6                                | >96                       |
| 7                                | >96                       |
| 8                                | >96                       |
| 9                                | >96                       |
| 10                               | >96                       |
| 11                               | >96                       |
| 12                               | >96                       |
| 13                               | 92                        |
| 14                               | 87                        |
| 15                               | 77                        |
| 16                               | 72                        |

[a] Average of duplicate experiments. RE% are reproducible within 4%

**Table S4.** Removal efficiency relevant to the recycle of 3 wt% gel of DBS in [bmim][NTf<sub>2</sub>].

| <b>Cycle</b> | <b>RE (%)<sup>a</sup></b> |
|--------------|---------------------------|
| 1            | >96                       |
| 2            | >96                       |
| 3            | >96                       |
| 4            | >96                       |
| 5            | >96                       |
| 6            | >96                       |
| 7            | >96                       |
| 8            | >96                       |
| 9            | >96                       |
| 10           | >96                       |
| 11           | >96                       |
| 12           | >96                       |
| 13           | >96                       |
| 14           | >96                       |
| 15           | >96                       |
| 16           | >96                       |
| 17           | >96                       |
| 18           | >96                       |
| 19           | >96                       |
| 20           | >96                       |
| 21           | >96                       |
| 22           | >96                       |
| 23           | 92                        |

[a] Average of duplicate experiments. RE% are reproducible within 4%



**Table S5.** Removal efficiency relevant to the recycle of 3 wt% gel of DBS in [bmipip][NTf<sub>2</sub>].

| <b>Cycle</b> | <b>RE (%)<sup>a</sup></b> |
|--------------|---------------------------|
| 1            | >96                       |
| 2            | >96                       |
| 3            | >96                       |
| 4            | 93                        |
| 5            | >96                       |
| 6            | 95                        |
| 7            | 93                        |
| 8            | >96                       |
| 9            | >96                       |
| 10           | >96                       |
| 11           | >96                       |
| 12           | >96                       |
| 13           | >96                       |
| 14           | >96                       |
| 15           | 93                        |
| 16           | 94                        |
| 17           | 95                        |
| 18           | 95                        |
| 19           | 91                        |
| 20           | 93                        |
| 21           | 96                        |
| 22           | 91                        |
| 23           | 95                        |
| 24           | >96                       |
| 25           | 95                        |
| 26           | >96                       |
| 27           | >96                       |
| 28           | 93                        |
| 29           | 89                        |
| 30           | 89                        |
| 31           | 92                        |
| 32           | 86                        |
| 33           | 84                        |
| 34           | 86                        |
| 35           | 87                        |
| 36           | 90                        |
| 37           | 86                        |
| 38           | 85                        |
| 39           | 82                        |
| 40           | 80                        |
| 41           | 78                        |

[a] Average of duplicate experiments. RE% are reproducible within 4%

**Table S6.** Adsorption capacities and equilibrium concentrations for % gels of DBS in aromatic ILs.

| <b>[bmim][NTf<sub>2</sub>]</b> |                             |
|--------------------------------|-----------------------------|
| <b>C<sub>e</sub> (mg/L)</b>    | <b>Q<sub>e</sub> (mg/g)</b> |
| 25                             | 41                          |
| 74                             | 44                          |
| 209                            | 49                          |
| 393                            | 47                          |
| 433                            | 163                         |
| 438                            | 264                         |
| 548                            | 344                         |
| <b>[bmim][PF<sub>6</sub>]</b>  |                             |
| <b>C<sub>e</sub> (mg/L)</b>    | <b>RE (%)</b>               |
| 82                             | 24                          |
| 210                            | 46                          |
| 317                            | 63                          |
| 405                            | 128                         |
| 582                            | 256                         |

**Table S7.** Adsorption capacities and equilibrium concentrations for % gels of DBS in aliphatic ILs.

| <b>[bmpyrr][NTf<sub>2</sub>]</b> |                             |
|----------------------------------|-----------------------------|
| <b>C<sub>e</sub> (mg/L)</b>      | <b>Q<sub>e</sub> (mg/g)</b> |
| 80                               | 30                          |
| 168                              | 36                          |
| 213                              | 39                          |
| 478                              | 62                          |
| 654                              | 81                          |
| <b>[bmpip][NTf<sub>2</sub>]</b>  |                             |
| <b>C<sub>e</sub> (mg/L)</b>      | <b>RE (%)</b>               |
| 210                              | 48                          |
| 360                              | 98                          |
| 478                              | 160                         |
| 506                              | 171                         |
| 604                              | 214                         |
